# Supplementary material for: Magnetic carbon gate electrodes for the development of electrolyte-gated organic field effect transistor bio-sensing platforms
Source: Royal Society of Chemistry journal article supplement (doi:10.1039/d3tc01655b), 2023-01-01
Supplement: d3tc01655b1.pdf [file d3tc01655b1.pdf]

Supplementary Information

**Magnetic carbon gate electrodes for the development of electrolyte-gated organic field effect transistor bio-sensing platforms**

Adrián Tamayo<sup>a</sup>, Jose Muñoz<sup>a,Ω</sup>, Carme Martínez-Domingo<sup>a</sup>, Marta Mas-Torrent<sup>a,b\*</sup>

<sup>a</sup>Institut de Ciència de Materials de Barcelona (ICMAB-CSIC), Campus de la UAB, 08193 Bellaterra, Spain

<sup>b</sup>Networking Research Center on Bioengineering Biomaterials and Nanomedicine (CIBER-BBN) Campus de la UAB, 08193 Bellaterra, Spain

<sup>Ω</sup> Current address: Chemistry Department, Universitat Autònoma de Barcelona, 08193 Bellaterra, Spain.

e-mail: mmas@icmab.es

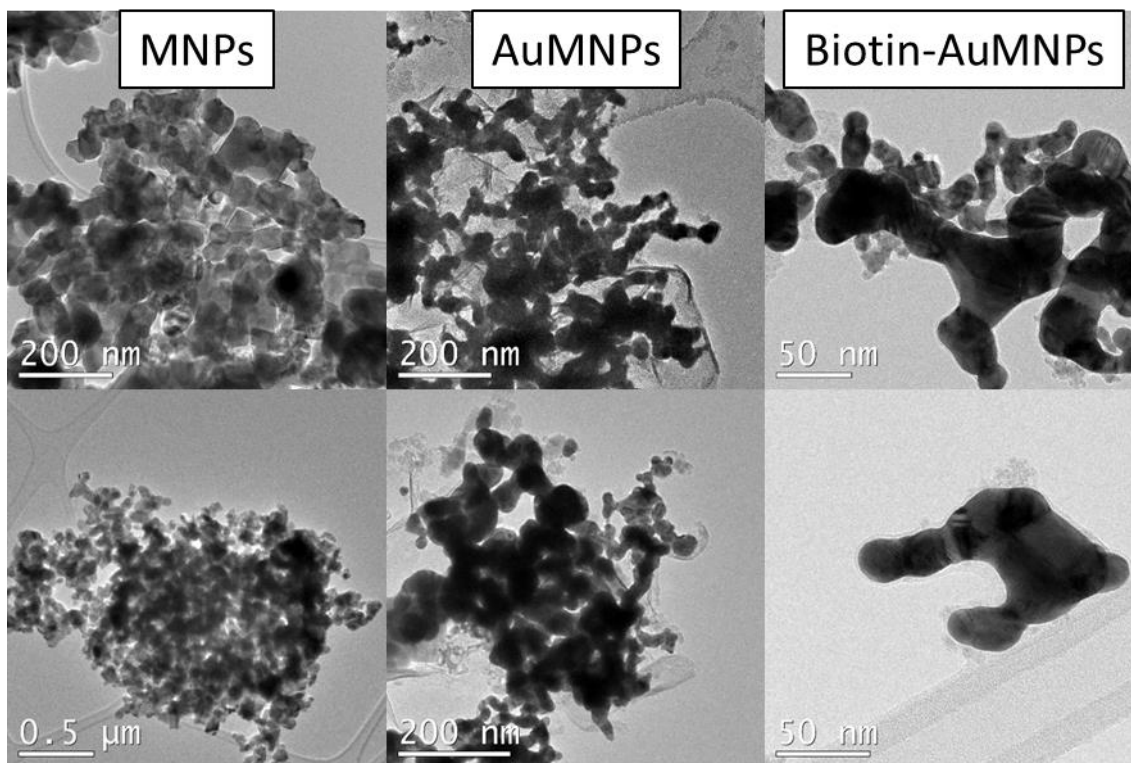

**Figure S1.** HR –TEM images of MNPs, AuMNPs and Biotin- AuMNPs.

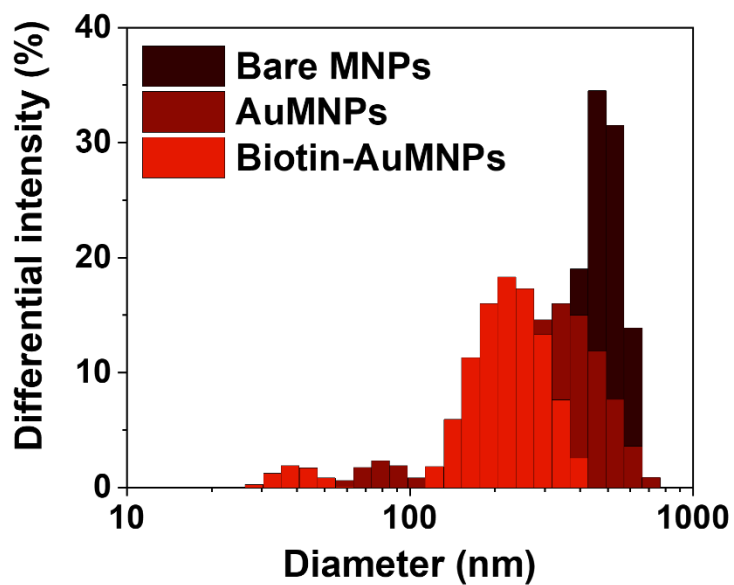

**Figure S2.** DLS measurements for hydrodynamic diameter of MNPs. The panel represents the results from three steps of the functionalization, each coloured differently.

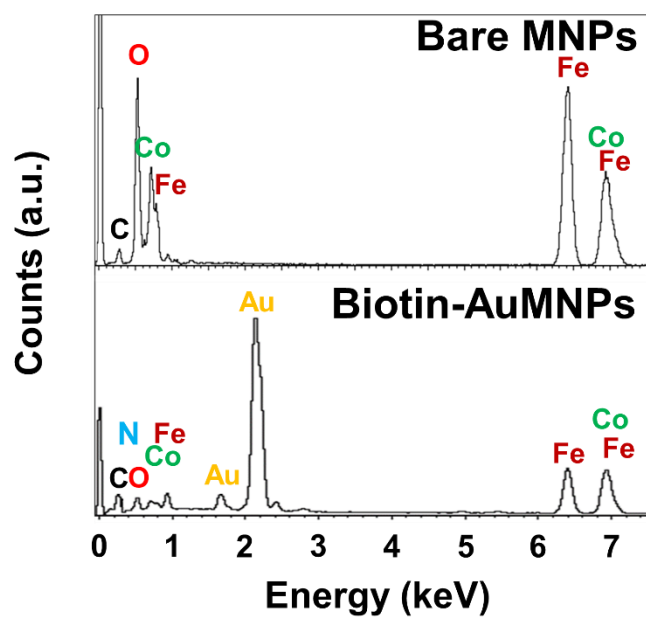

| Element | Bare MNPs   |            | Biotin-AuMNPs |            |
|---------|-------------|------------|---------------|------------|
|         | Peak (Area) | Atomic (%) | Peak (Area)   | Atomic (%) |
| C K     | 691         | 6.76       | 3974          | 23.10      |
| N K     | -           | -          | 601           | 3.76       |
| O K     | 10134       | 55.59      | 3000          | 9.78       |
| Fe K    | 24607       | 24.61      | 25537         | 15.18      |
| Co K    | 12994       | 13.04      | 24436         | 14.58      |
| Au L    | -           | -          | 87243         | 33.60      |

**Figure S3.** EDX spectrum of (bottom) Biotin-AuMNPs and (top) bare MNPs.

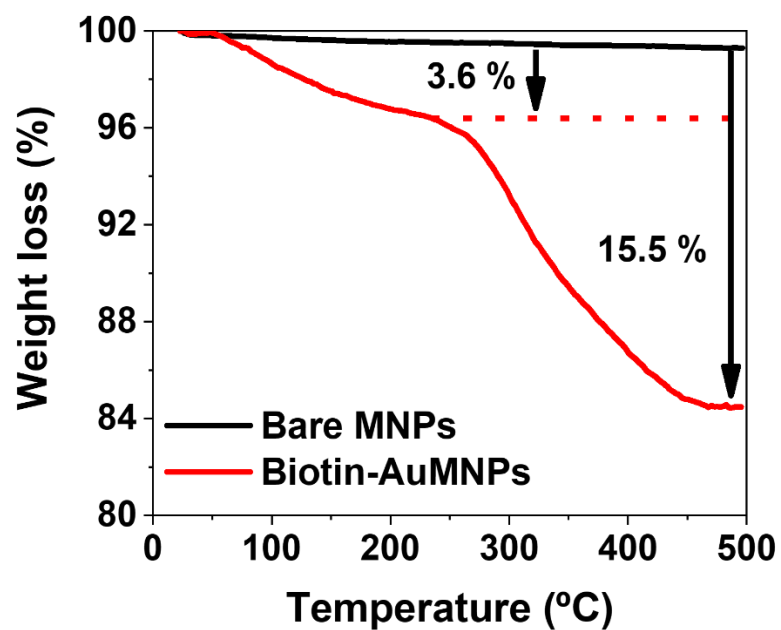

**Figure S4.** TGA curves of the Biotin-AuMNPs and MNPs.

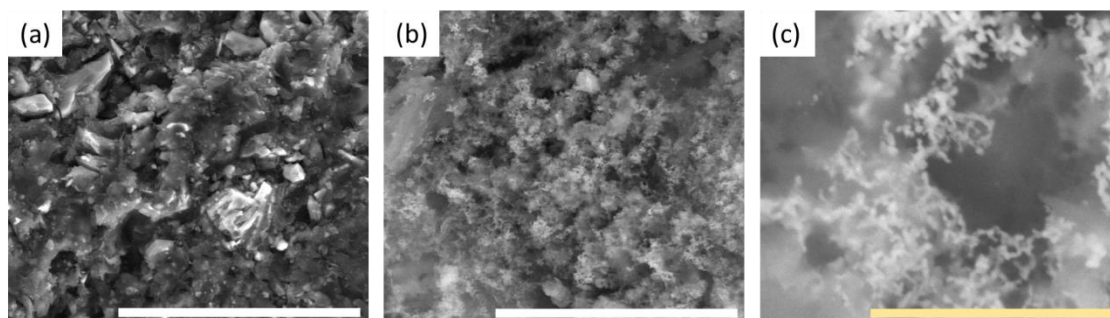

**Figure S5.** SEM images of bare (a) CGE and (b-C) Biotin-AuMNPs collected on the surface of the CGE. White Bar scale: 20  $\mu\text{m}$  and yellow bar scale: 1  $\mu\text{m}$

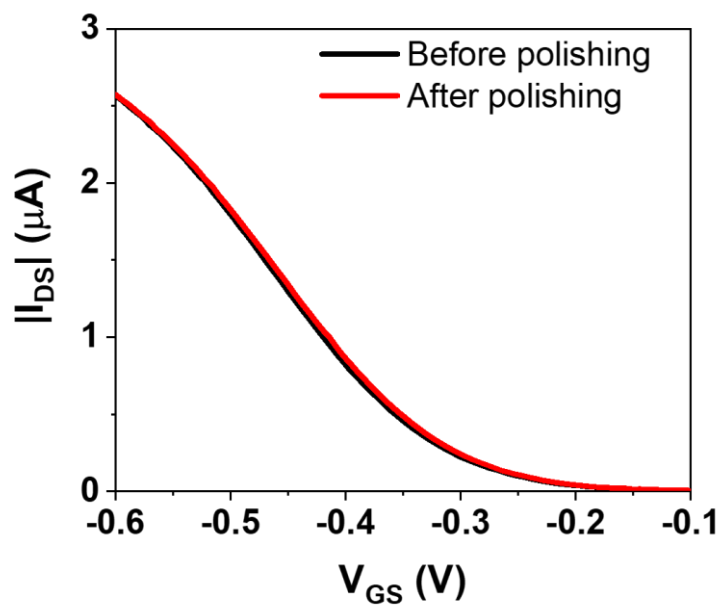

**Figure S6.** Transfer characteristics ( $V_{DS} = -0.1$  V) of the EGOFETs before and after the polishing of the CGEs.

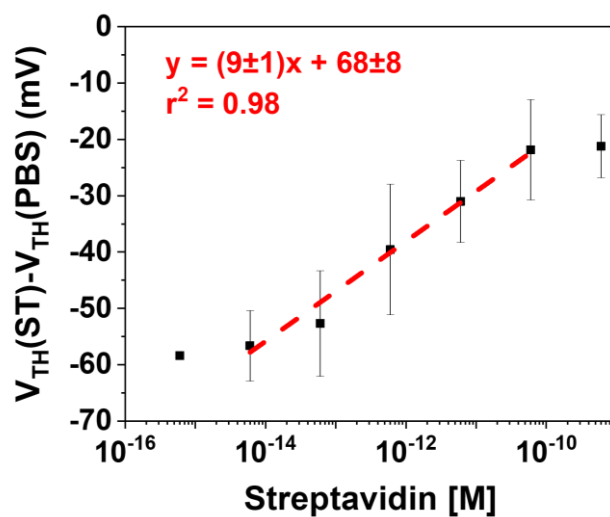

**Figure S7.**  $V_{TH}$  shift vs. Streptavidin concentration plot and calibration curve. The bar error is relative to three different devices.

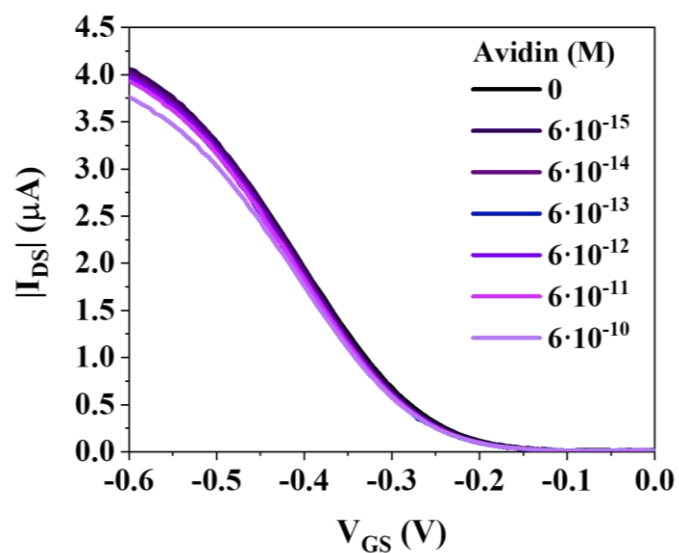

**Figure S8.** Transfer characteristics ( $V_{DS} = - 0.1$  V) of the EGOFETs employing as gate electrode a CGE with collected MNPs incubated in AV solutions of different concentrations.

| Method                        | Limit of Detection (LOD) | Analyte             | Transducer                                                                                        | Ref      |
|-------------------------------|--------------------------|---------------------|---------------------------------------------------------------------------------------------------|----------|
| Competitive Immunoassay       | 2 pM                     | Biotin              | Antibiotin antibody- magnetic beads and gold nanoparticles                                        | 1        |
| Electrochemical               | 89.1 nM                  | Biotin              | Avidin-immobilized gold electrode with 11-mercaptodecanoic acid                                   | 2        |
|                               | 6.6 pM                   | Biotin              | Gold electrode modified with 3-mercaptopropanoic acid and silver nanoparticles                    | 3        |
|                               | 84 nM                    | Biotin              | Streptavidin-modified magnetic microbeads captured by magneto graphite-epoxy composite electrodes | 4        |
|                               | 5 nM                     | Biotin              | Nafion-modified boron-doped diamond electrode                                                     | 5        |
| Field Effect Transistor (FET) | 0.4 pM                   | Avidin              | Gold nanoparticles-decorated graphene FET                                                         | 6        |
|                               | 10 fM                    | Streptavidin        | Amorphous indium-gallium-zinc-oxide (a-IGZO) FET with functionalized extended-gate electrode      | 7        |
|                               | 2.3 $\mu$ M              | Streptavidin        | Biotin-coated magnetic beads onto the gate insulator of an Ion-Sensitive FET                      | 8        |
|                               | -                        | Avidin              | Biotinylated organic semiconductor (fluorene and biothiophene co-polymers, F8T2)                  | 9        |
|                               | -                        | Streptavidin-Avidin | Bioreceptors anchored onto poly(3-hexylthiophene (P3HT)                                           | 10       |
|                               | 6 fM                     | Streptavidin        | Biotin functionalized carbon paste-based gate electrodes                                          | Our Work |

**Table S1.** Comparison of the performance of different sensors reported to detect ST and AV.

## Bibliography

- 1 W. Z. Lin, Y. H. Chen, C. K. Liang, C. C. Liu and S. Y. Hou, *Food Chem.*, 2019, **271**, 440–444.
- 2 S. J. Ding, B. W. Chang, C. C. Wu, M. F. Lai and H. C. Chang, *Electrochim. Acta*, 2005, **50**, 3660–3666.
- 3 N. Bage and P. Kar, *Sensors Int.*, 2022, **3**, 100159.
- 4 S. V. Kergaravat, G. A. Gómez, S. N. Fabiano, T. I. Laube Chávez, M. I. Pividori and S. R. Hernández, *Talanta*, 2012, **97**, 484–490.
- 5 A. Buzid, G. P. McGlacken, J. D. Glennon and J. H. T. Luong, *ACS Omega*, 2018, **3**, 7776–7782.
- 6 S. Wang, M. Z. Hossain, T. Han, K. Shinozuka, T. Suzuki, A. Kuwana and H. Kobayashi, *ACS Omega*, 2020, **5**, 30037–30046.
- 7 J. Lee, M. J. Kim, H. Yang, S. Kim, S. Yeom, G. Ryu, Y. Shin, O. Sul, J. K. Jeong and S. B. Lee, *IEEE Sens. J.*, 2021, **21**, 178–184.
- 8 H. Yang and T. Sakata, *Sensors*, 2019, **19**, 3393.
- 9 Z. S. Kim, S. C. Lim, S. H. Kim, Y. S. Yang and D. H. Hwang, *Sensors*, 2012, **12**, 11238–11248.
- 10 G. Palazzo, D. De Tullio, M. Magliulo, A. Mallardi, F. Intranuovo, M. Y. Mulla, P. Favia, I. Vikholm-Lundin and L. Torsi, *Adv. Mater.*, 2015, **27**, 911–916.
